# Supplementary material for: Effects of brackish water inflow on methane-cycling microbial communities in a freshwater rewetted coastal fen
Source: Copernicus journal article supplement (doi:10.5194/bg-19-3625-2022), 2022-08-05
Supplement: Supplementary file 4 [file bg-19-3625-2022-supplement.zip]

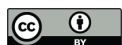

*Supplement of*

**Effects of brackish water inflow on methane-cycling microbial communities in a freshwater rewetted coastal fen**

**Cordula Nina Gutekunst et al.**

*Correspondence to:* Cordula Nina Gutekunst ([cordula.gutekunst@uni-rostock.de](mailto:cordula.gutekunst@uni-rostock.de))

- [bg-19-3625-2022-supplement-title-page.pdf](#)
- [C-Gutekunst-R-Markdown.pdf](#)
- [Table S1.pdf](#)
- [Table S2.pdf](#)

The copyright of individual parts of the supplement might differ from the article licence.
